# Supplementary material
Source: PubMed Central journal article supplement (PMC4438771)
Supplement: NIHMS676681-supplement-1.pdf [file NIHMS676681-supplement-1.pdf]

## **Supplemental Information**

### **Intratumoral myeloid cells drive responsiveness and resistance to anti-angiogenic therapy**

Lee B. Rivera, David Meyronet, Valerie Hervieu, Mitchell J. Frederick, Emily Bergsland, and Gabriele Bergers

#### **SUPPLEMENTAL INFORMATION INVENTORY:**

##### **Supplemental Data**

Figure S1 is related to Figure 1.

Figure S2 is related to Figure 1 and the Discussion.

Figure S3 is related to Figure 2.

Figure S4 is related to Figure 4.

Figure S5 is related to Figure 5 .

Figure S6 is related to Figure 7.

Figure S7 is related to Figure 7.

##### **Supplemental Experimental Procedures**
